# Supplementary material for: Structure property studies revealed a new indoylfuranone based bifunctional chemosensor for Cu2+ and Al3+
Source: Royal Society of Chemistry journal article supplement (doi:10.1039/c6ay01786j), 2016-01-01

## Electronic Supporting Information

### **Structure property studies revealed a new indoylfuranone based bifunctional chemosensor for Cu<sup>2+</sup> and Al<sup>3+</sup>**

Lokesh Kumar Kumawat,<sup>a‡</sup> Manoj Kumar,<sup>b‡</sup> Priyanka Bhatt,<sup>c</sup> Anjali jha,<sup>c</sup> Vinod Kumar Gupta,<sup>a</sup> and Anuj Sharma<sup>b\*</sup>

<sup>a</sup>*Department of Applied Chemistry, University of Johannesburg, Johannesburg, South-Africa*

<sup>b</sup>*Department of Chemistry, Indian Institute of Technology Roorkee, Roorkee-247667, India*

<sup>c</sup>*Department of Chemistry, GITAM Institute of Science, GITAM University, Visakhapatnam, Andhra Pradesh 530045, India.*

*\*Corresponding author*

*Phone: +9113 3228 475, Fax: +9113 3227 3560*

*e-mail: [anujsharma.mcl@gmail.com](mailto:anujsharma.mcl@gmail.com), [anujsfcy@iitr.ac.in](mailto:anujsfcy@iitr.ac.in)*

*‡Contributed equally as co-first authors.*

|                                                        |         |
|--------------------------------------------------------|---------|
| <b>Title Page</b> .....                                | S1      |
| <b>Content Page (This Page)</b> .....                  | S2      |
| <b>Analytical data (compound A to D)</b> .....         | S3-S4   |
| <b>Spectra</b> .....                                   | S5-S10  |
| <sup>1</sup> H NMR Spectra of compound <b>A</b> .....  | S5      |
| <sup>1</sup> H NMR Spectra of compound <b>B</b> .....  | S6      |
| <sup>1</sup> H NMR Spectra of compound <b>C</b> .....  | S7      |
| <sup>1</sup> H NMR Spectra of compound <b>D</b> .....  | S8      |
| <sup>13</sup> C NMR Spectra of compound <b>D</b> ..... | S9      |
| HRMS of compounds <b>A-D</b> .....                     | S10     |
| <b>Figure (SS1 to SS8)</b> .....                       | S11-S18 |

## Spectral Data

### 2-(tert-butylamino)-3-(1H-indol-3-yl)furo[3,2-c]quinolin-4-ol (compound A)

Yield: 85% ; <sup>1</sup>H NMR (400 MHz, DMSO-d<sub>6</sub>): δ (ppm) 1.60 (s, 9H), 3.93 (br s, 1H), 7.53 (td, 1H, *J* = 6.0 & 1.3 Hz), 7.56-7.65 (m, 4H), 7.68-7.74 (m, 2H), 7.92 (dd, 1H, *J* = 5.9 & 1.3 Hz), 8.16 (dd, 1H, *J* = 5.9 & 1.3 Hz), 8.93 (s, 1H), 9.71 (s, 1H). HRMS (ESI) *m/z* calcd. for C<sub>23</sub>H<sub>21</sub>N<sub>3</sub>O<sub>2</sub> [M+Na]<sup>+</sup>: 394.1532, found: 394.1528.

### 2-(cyclohexylamino)-1-(1H-indol-3-yl)-11H-benzo[h]furo[3,2-c]chromen-11-one (compound B)

Yield: 87% ; <sup>1</sup>H NMR (400 MHz, DMSO-d<sub>6</sub>): δ (ppm) 1.30-1.39 (m, 3H), 1.44 (sex, 2H, *J* = 2.4 Hz), 1.62-1.70 (m, 3H), 2.05 (sex, 2H, *J* = 2.5 Hz), 3.14 (quin, 1H, *J* = 2.3 Hz), 3.93 (br s, 1H), 7.20-7.28 (m, 2H), 7.37-7.43 (m, 3H), 7.53-7.58 (m, 2H), 7.68 (d, 1H, *J* = 6.0 Hz), 7.73 (td, 1H, *J* = 3.4 & 1.1 Hz), 7.88 (dd, 1H, *J* = 4.8 & 1.8 Hz), 8.05-8.10 (m, 1H), 8.93 (s, 1H). HRMS (ESI) *m/z* calcd. for C<sub>29</sub>H<sub>24</sub>N<sub>2</sub>O<sub>3</sub> [M+Na]<sup>+</sup>: 471.1685, found: 471.1676.

### 2-(tert-butylamino)-1-(1H-indol-3-yl)-11H-benzo[h]furo[3,2-c]chromen-11-one (compound C)

Yield: 85% ; <sup>1</sup>H NMR (400 MHz, CDCl<sub>3</sub>): δ (ppm) 1.11 (s, 9H), 3.92 (br s, 1H), 6.54 (td, 1H, *J* = 6.2 & 1.1 Hz), 6.68 (s, 1H), 7.08 (td, 1H, *J* = 6.0 & 1.1 Hz), 7.14-7.23 (m, 4H), 7.32 (dd, 1H, *J* = 6.0 & 1.1 Hz), 7.44 (d, 1H, *J* = 6.0 Hz), 7.49 (td, 1H, *J* = 3.6 & 1.2 Hz), 7.81-7.87 (m, 1H), 9.37 (s, 1H). HRMS (ESI) *m/z* calcd. for C<sub>27</sub>H<sub>22</sub>N<sub>2</sub>O<sub>3</sub> [M+Na]<sup>+</sup>: 445.1528, found: 445.1518.

**2-(tert-butylamino)-3-(1H-indol-3-yl)naphtho[2,3-b]furan-4,9-dione (compound D)**

Yield: 81%; <sup>1</sup>H NMR (400 MHz, CDCl<sub>3</sub>): δ (ppm) 1.08 (s, 9H), 3.92 (br s, 1H), 6.74 (td, 1H, *J* = 6.0 & 1.3 Hz), 6.81 (s, 1H), 7.29 (td, 1H, *J* = 6.0 & 1.1 Hz), 7.33 (dd, 1H, *J* = 5.8 & 1.1 Hz), 7.39 (td, 1H, *J* = 5.9 & 1.1 Hz), 7.44 (td, 1H, *J* = 5.9 & 1.1 Hz), 7.68 (dd, 1H, *J* = 6.0 & 1.1 Hz), 7.78 (dd, 1H, *J* = 6.0 & 1.1 Hz), 7.86 (dd, 1H, *J* = 5.9 & 1.1 Hz), 9.33 (s, 1H). <sup>13</sup>C NMR: (100 MHz, CDCl<sub>3</sub>): δ (ppm) 29.7, 53.6, 98.1, 112.4, 121.8, 123.3, 124.8, 126.6, 126.9, 128.5, 132.3, 133.1, 133.8, 135.1, 138.1, 153.6, 172.9, 176.2, 182.1. HRMS (ESI) *m/z* calcd. for C<sub>24</sub>H<sub>20</sub>N<sub>2</sub>O<sub>3</sub> [M+Na]<sup>+</sup>: 407.1372, found: 407.1368.

# Compound **X**, **Y** and **Z** were synthesized according to literature described methods (1, 2 and 3 respectively).

(1) M. B. Teimouri and R. Bazhrang, *Monatsh Chem.*, 2008, **139**, 957–961.

(2) M. Kumar, S. Bagchi and A. Sharma, *RSC Adv.*, 2015, **5**, 53592-53603.

(3) R. Zhang, D. Xu and J. Xie, *Chin. J. Chem.*, 2012, **30**, 1690-1694.

# <sup>1</sup>H NMR Spectra of compound A

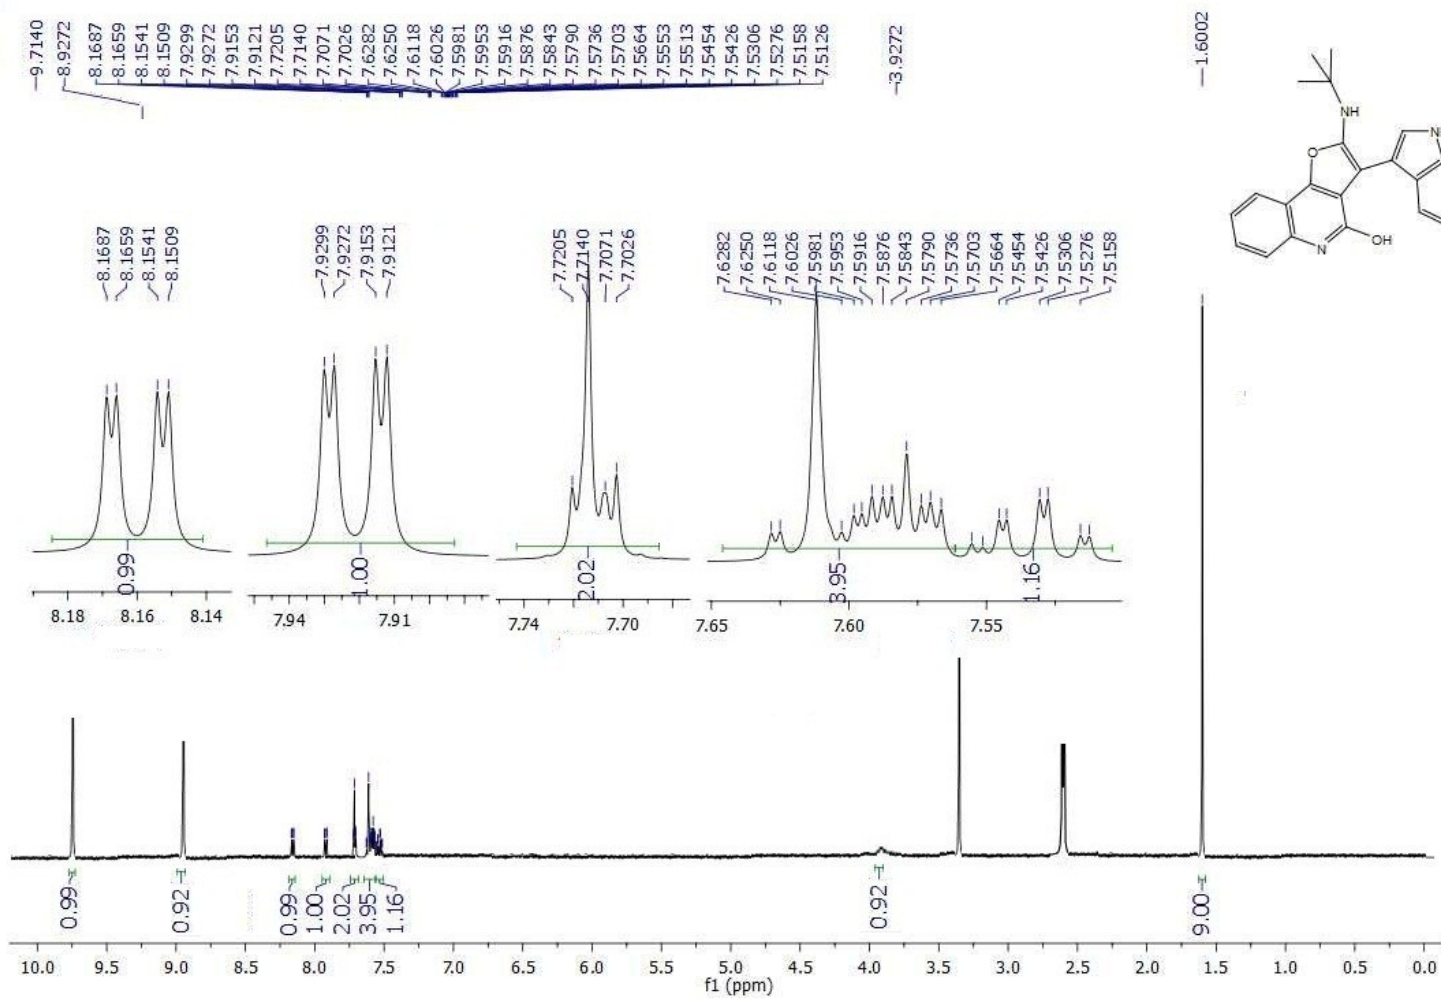

# <sup>1</sup>H NMR Spectra of compound B

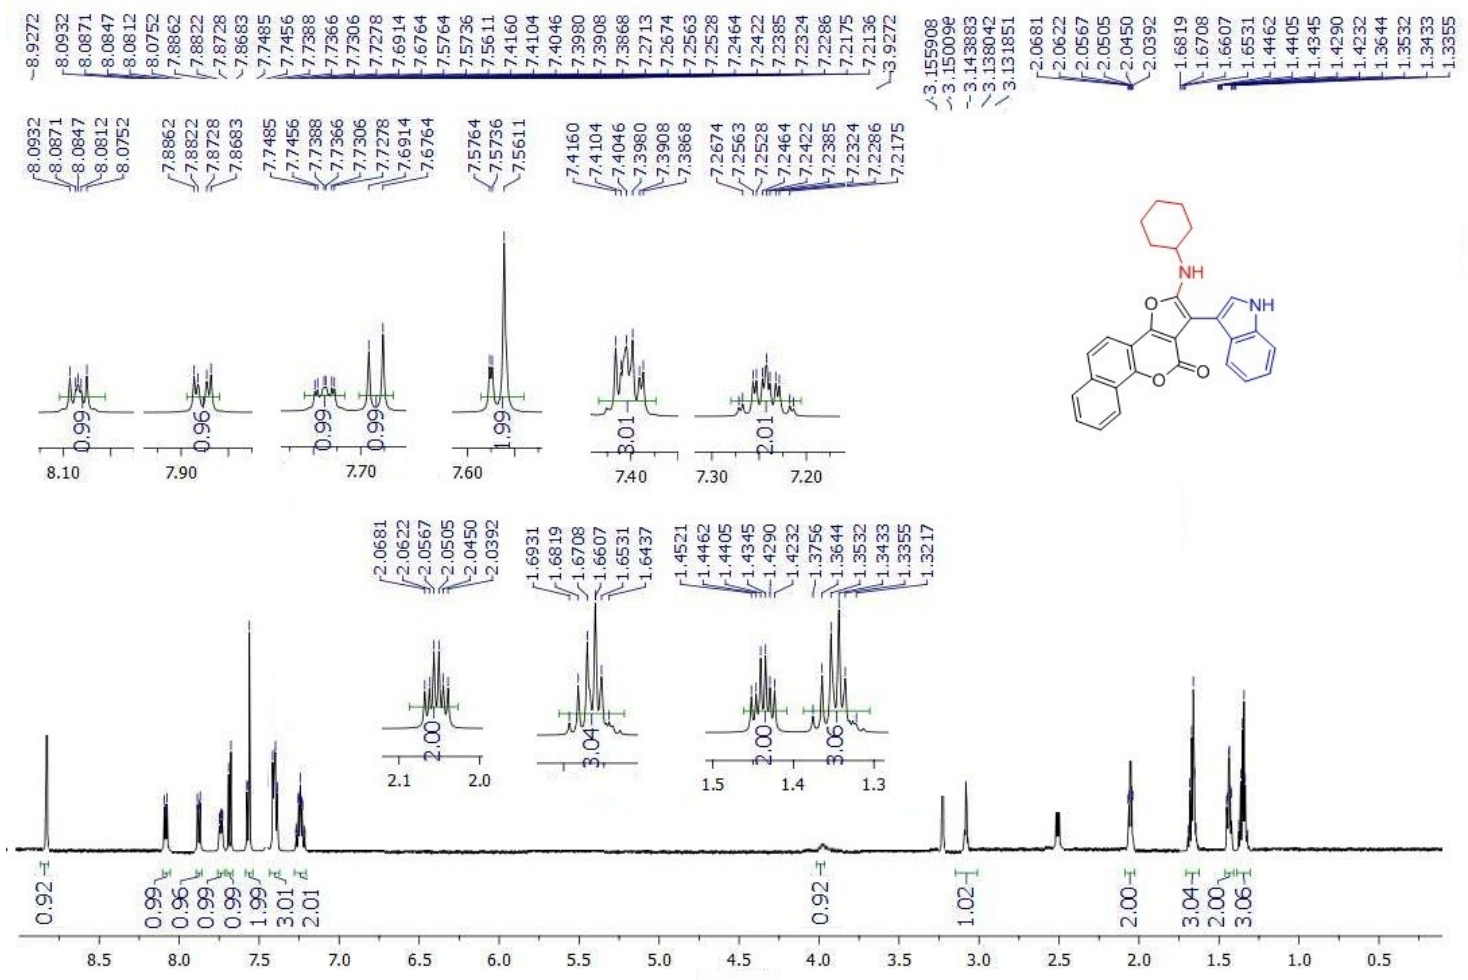

# <sup>1</sup>H NMR Spectra of compound C

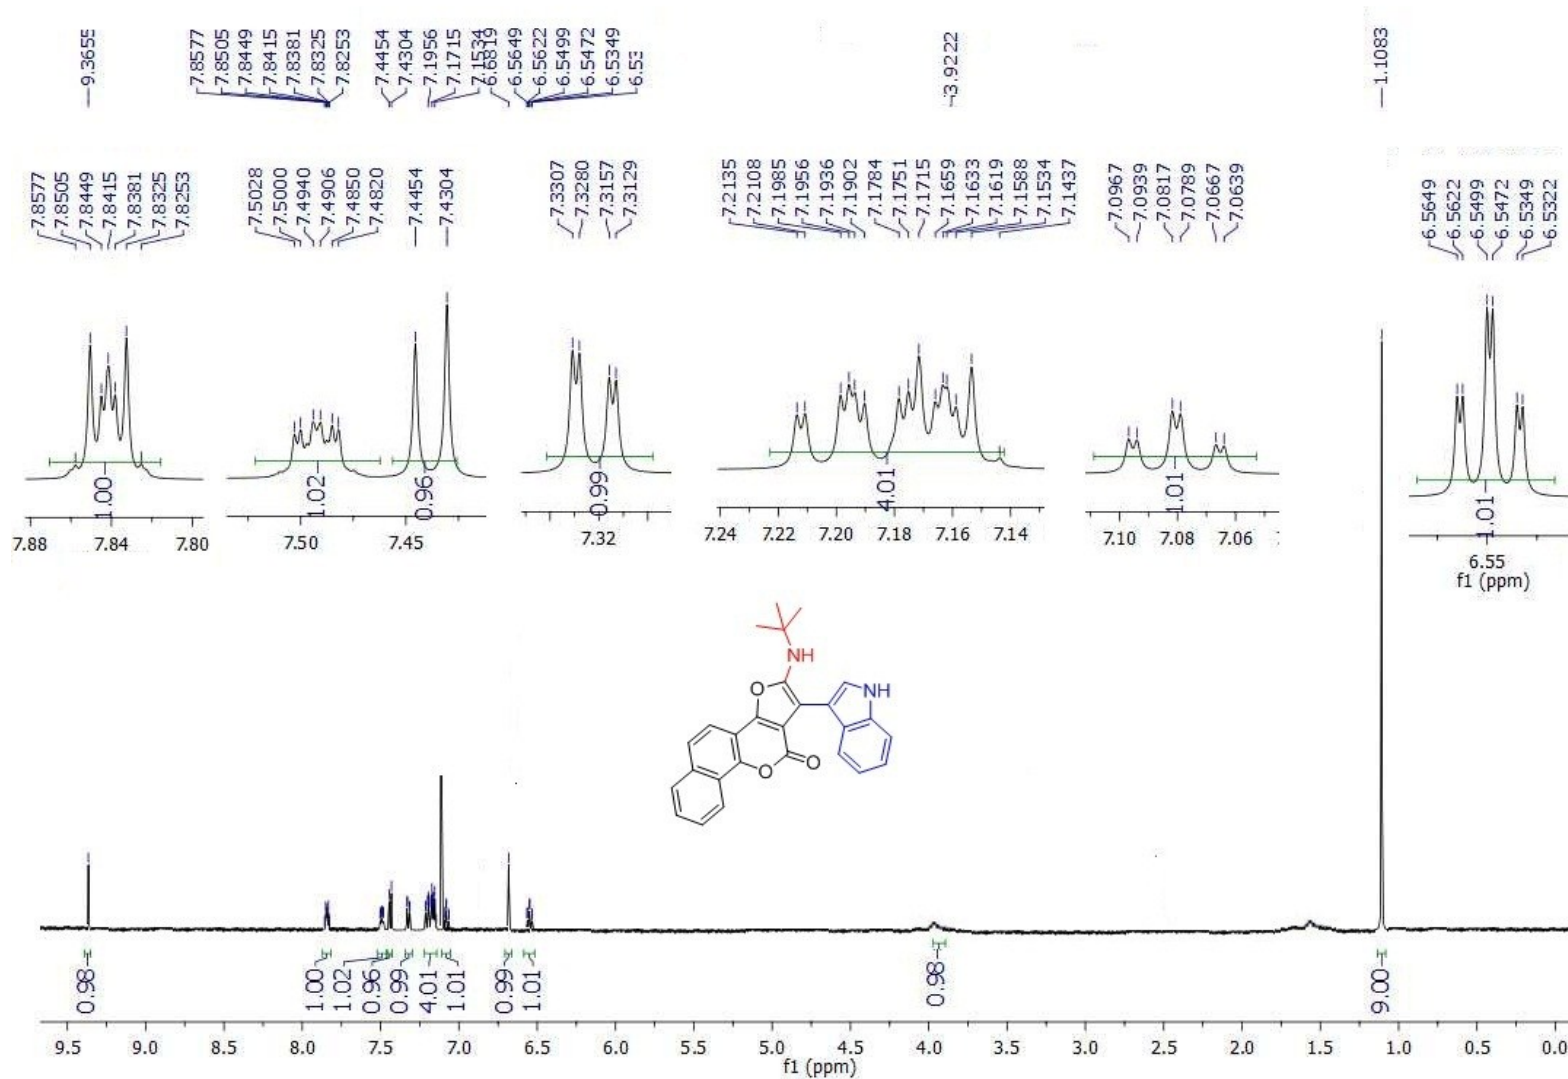

# $^1\text{H}$ NMR Spectra of compound **D**

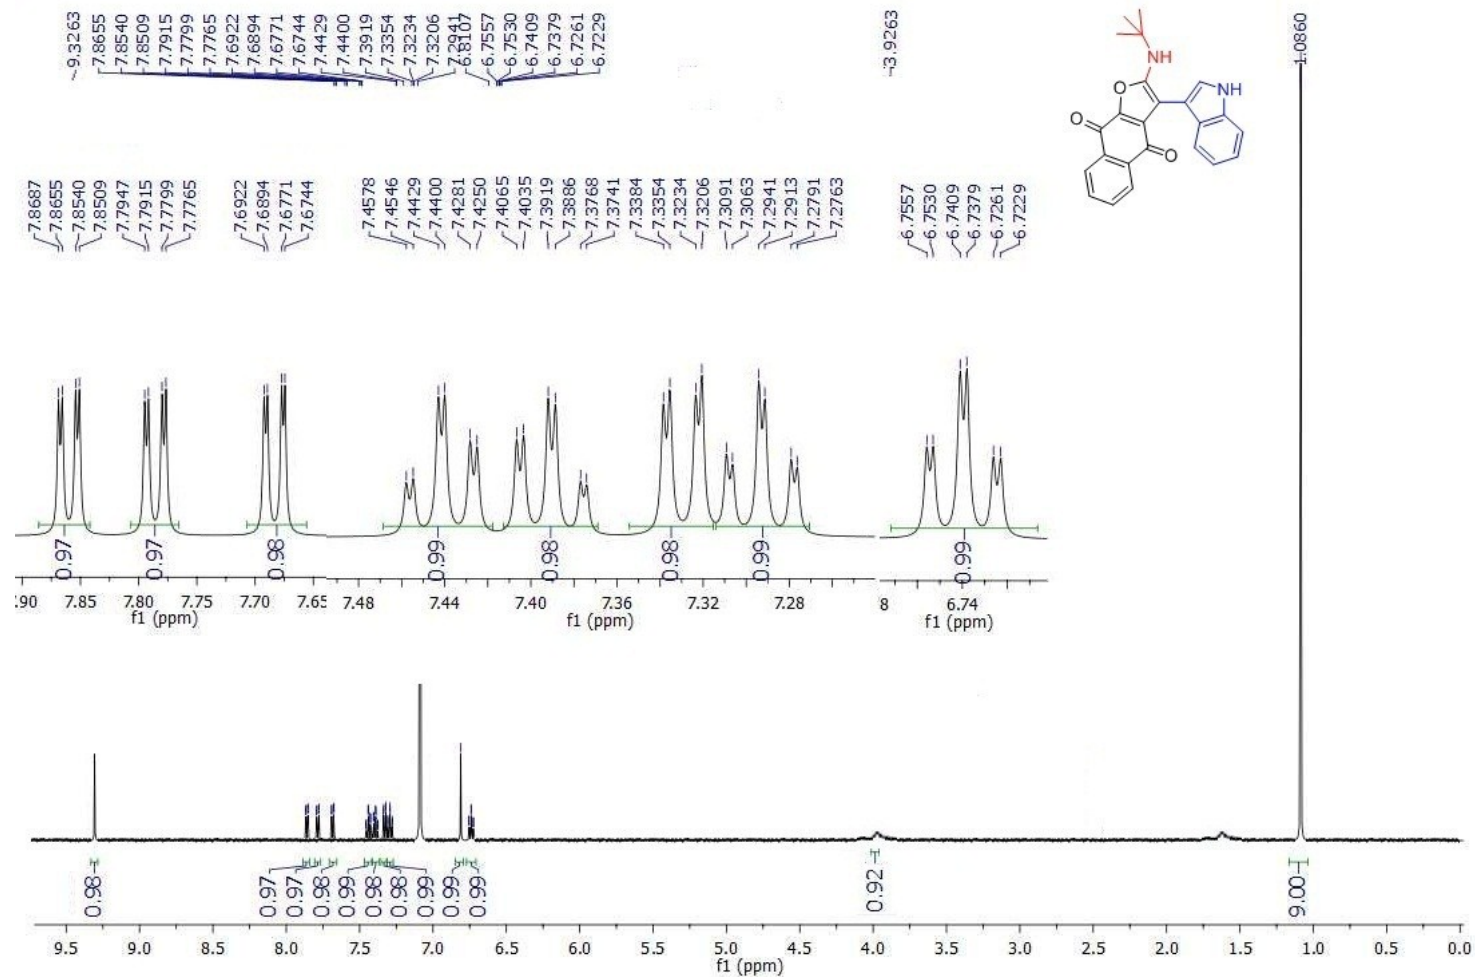



<sup>13</sup>CNMR Spectra of compound **D**

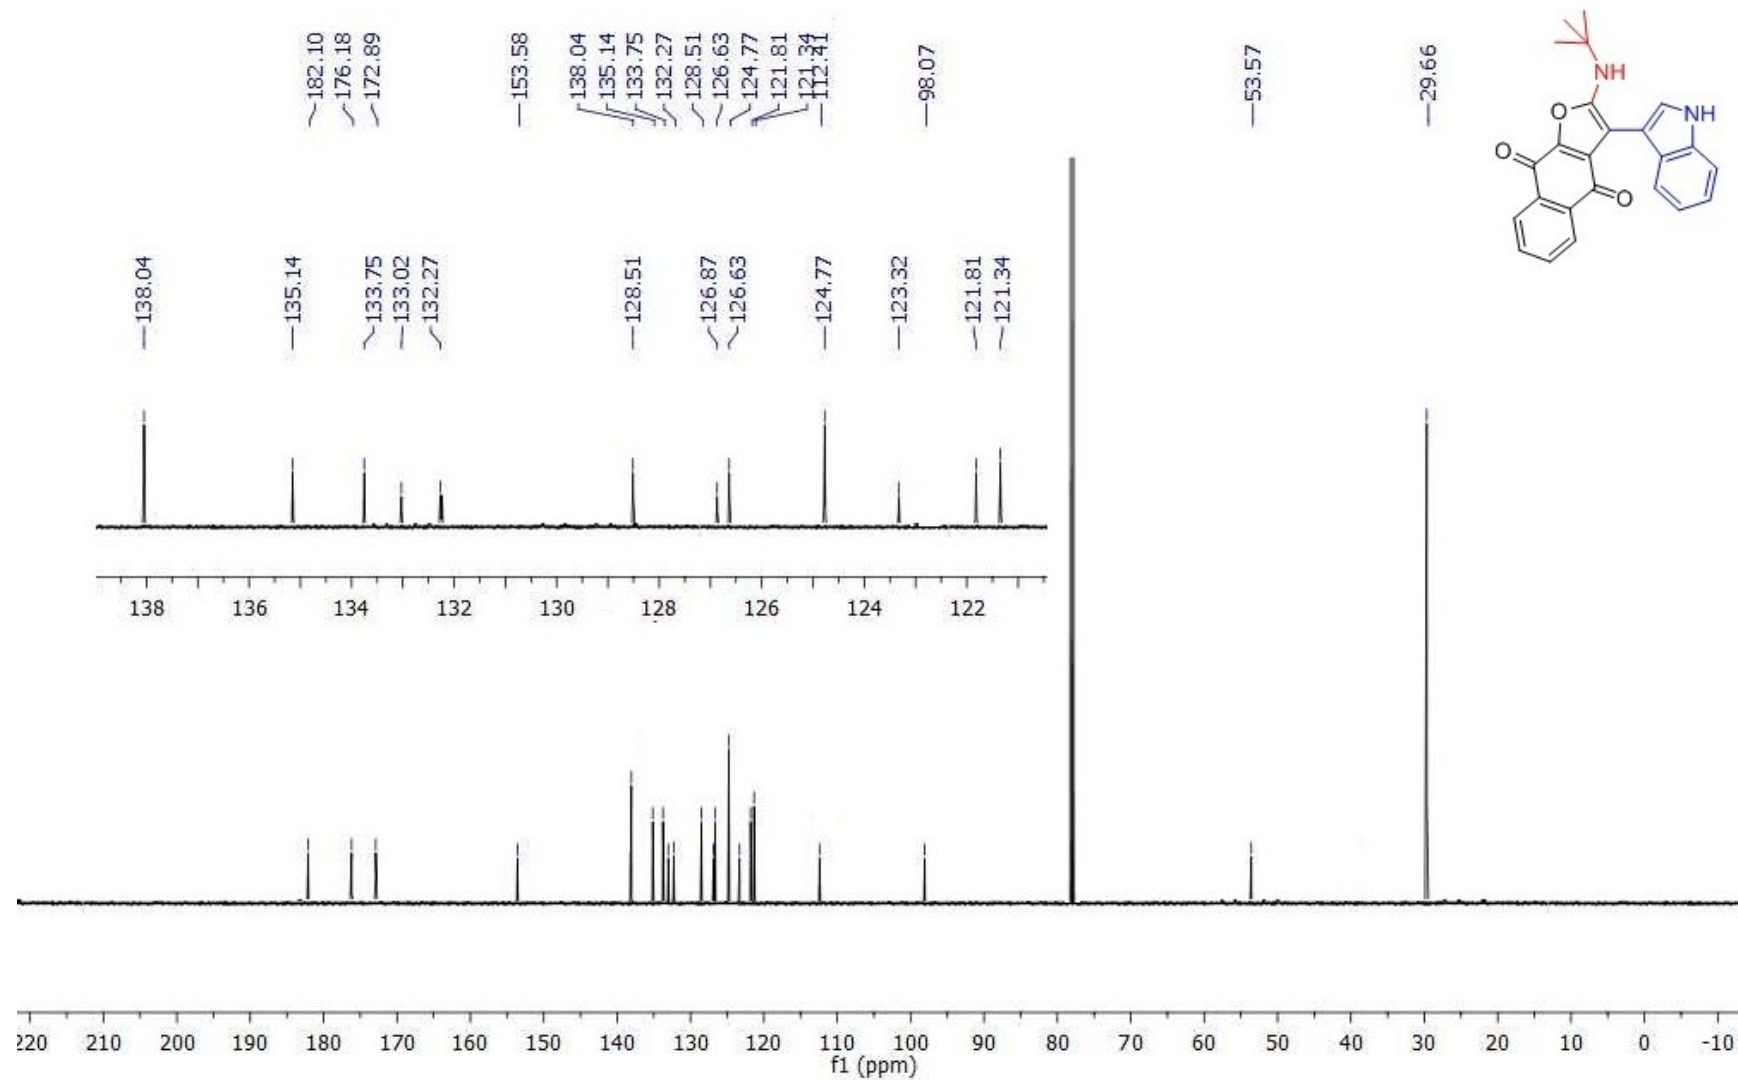

# HRMSof compounds A to D

Waters QToF Micro

PU/ UNIVERSITY, 22-06-2013 , 12.10, Final Report-6

NKMANP1MS424 14 (0.260) SAMPLE NAME COMPOUND A

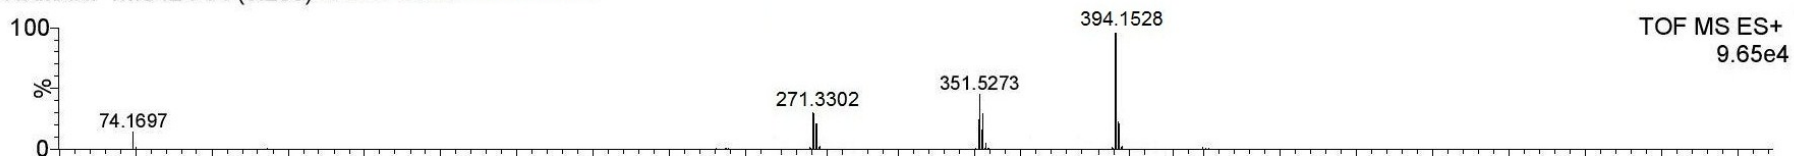

NKMANP1MS268 54 (1.000) SAMPLE NAME COMPOUND B

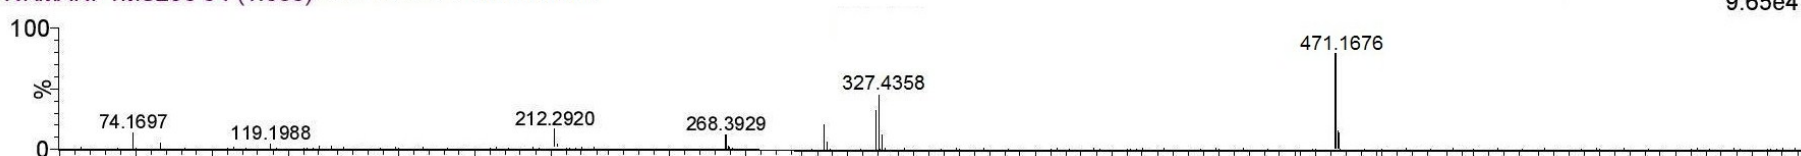

NKMANP1MS351 23 (0.427) SAMPLE NAME COMPOUND C

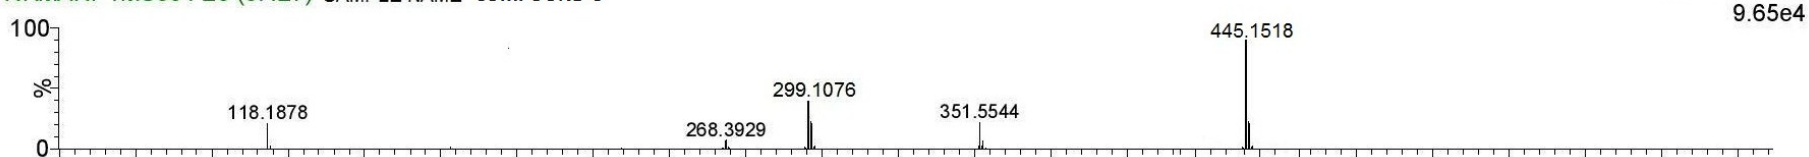

NKMANP1 25 (0.464) SAMPLE NAME COMPOUND D

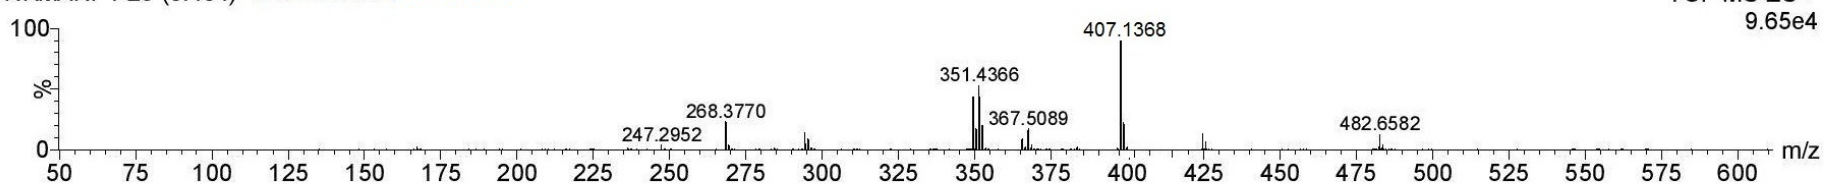

**Figure S1** Benesi-Hilderbrand plots between  $1/I - I_0$  (at 574 nm) and  $1/[Cu^{2+}]$ .

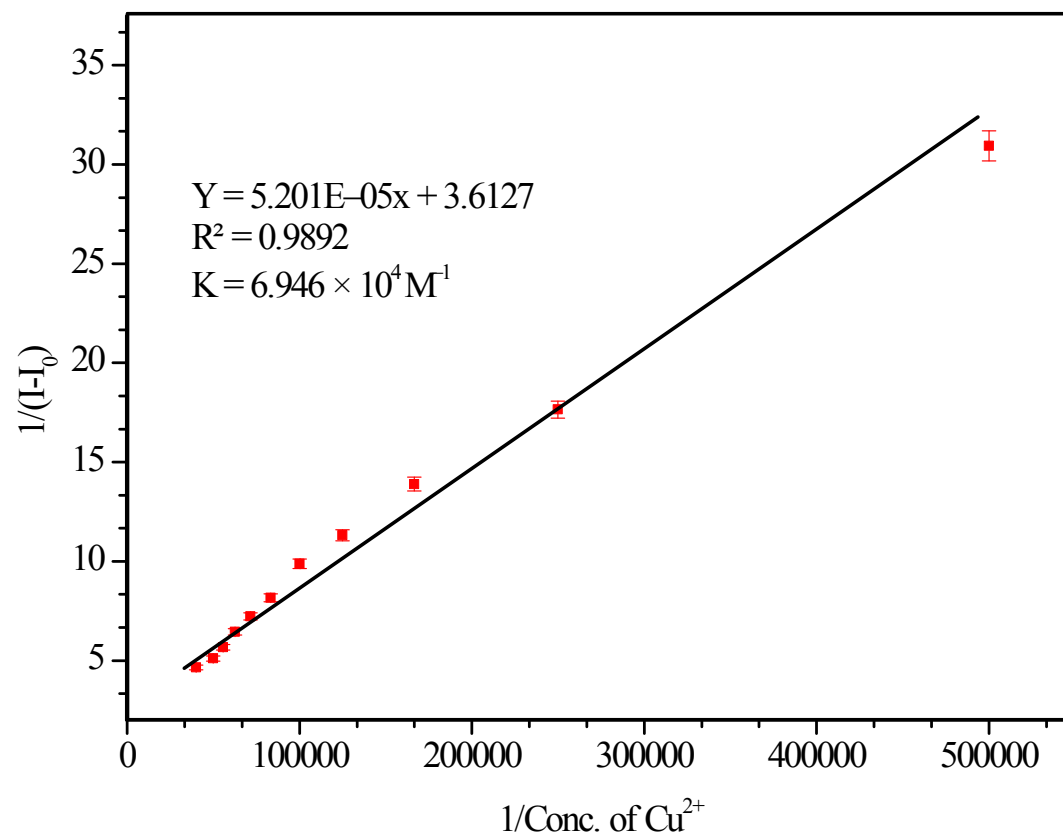

**Figure S2** Job's plot (absorption) of probe **D** with  $\text{Cu}^{2+}$  in (MeOH/ $\text{H}_2\text{O}$ , 2/8, v/v).  
(Total concentration of probe and metal was kept constant at the level of 20  $\mu\text{M}$ ).

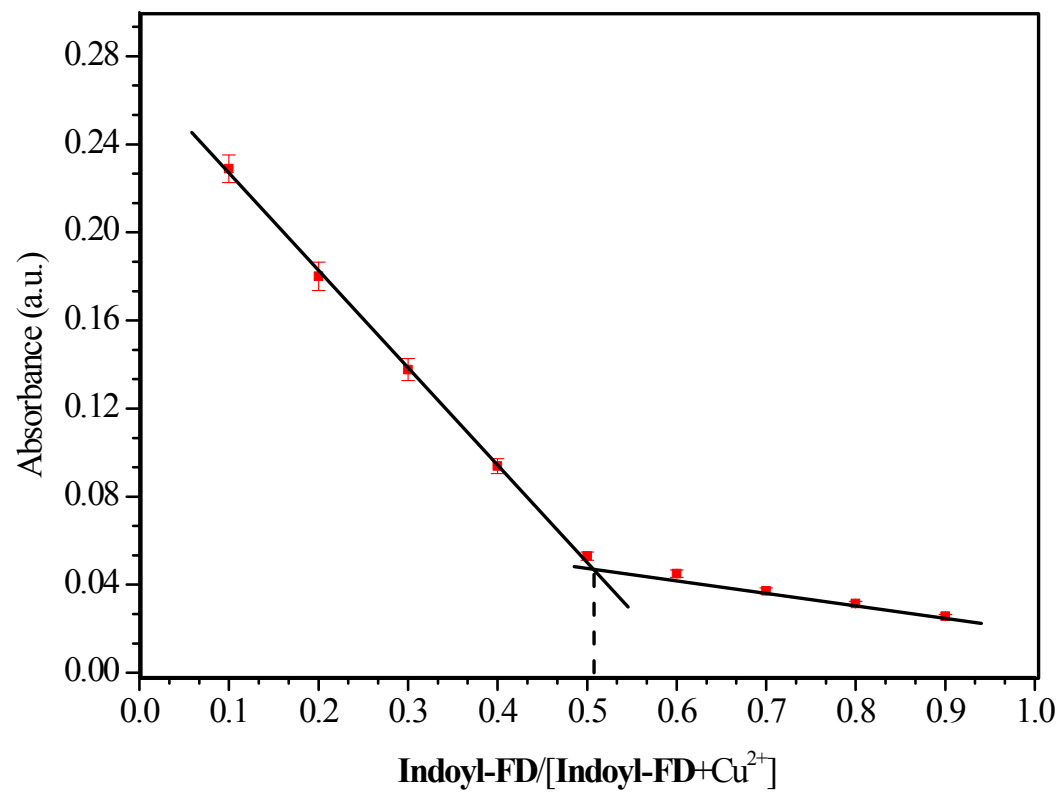

**Figure SS3** Benesi-Hilderbrand plots between  $1/I - I_0$  (at 598 nm) and  $1/[Al^{3+}]$ .

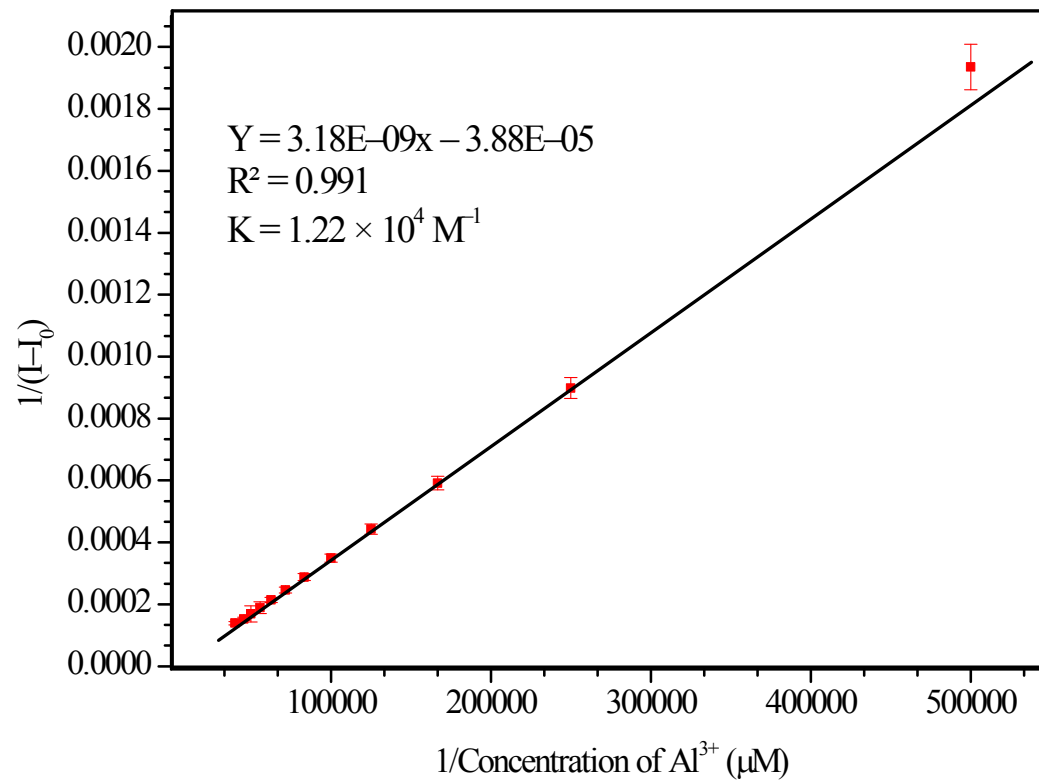

**Figure S4** Job's plot (emission) of probe **D** with  $\text{Al}^{3+}$  in (MeOH/ $\text{H}_2\text{O}$ , 2/8, v/v).  
(Total concentration of probe and metal is kept constant at the level of 20  $\mu\text{M}$ ).

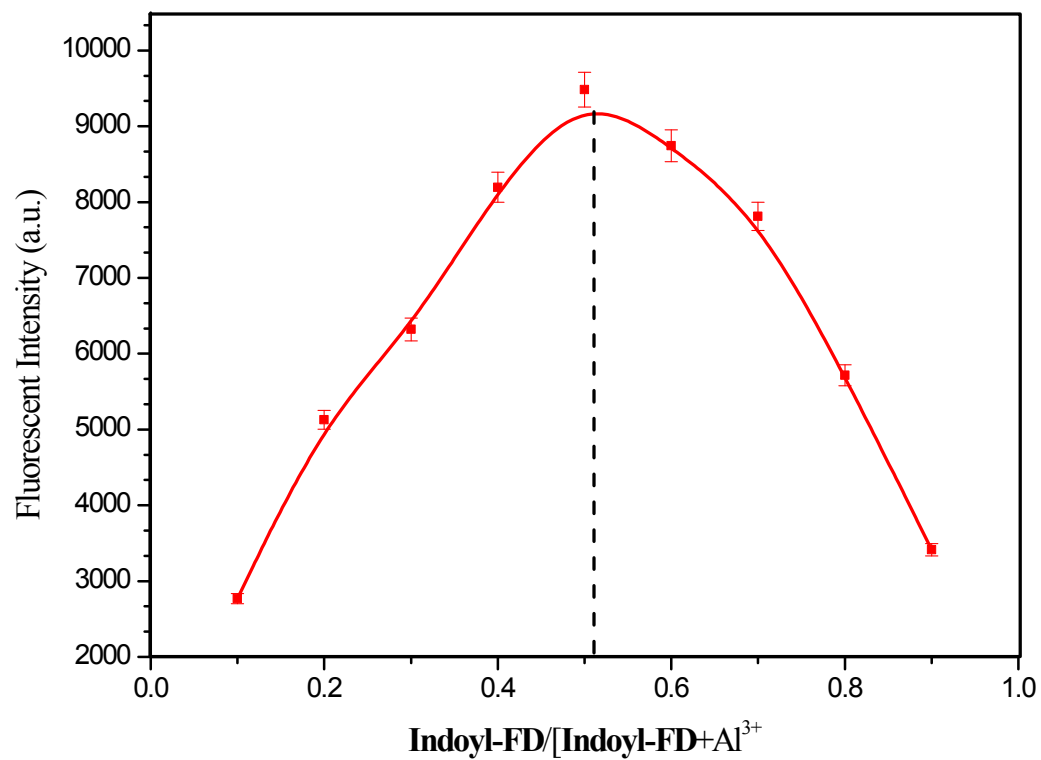

**Figure S5** Dependence of fluorescence response of furandioneD–Cu<sup>2+</sup> over pH of the medium (MeOH/Water, 2/8, v/v) was used as a solvent.

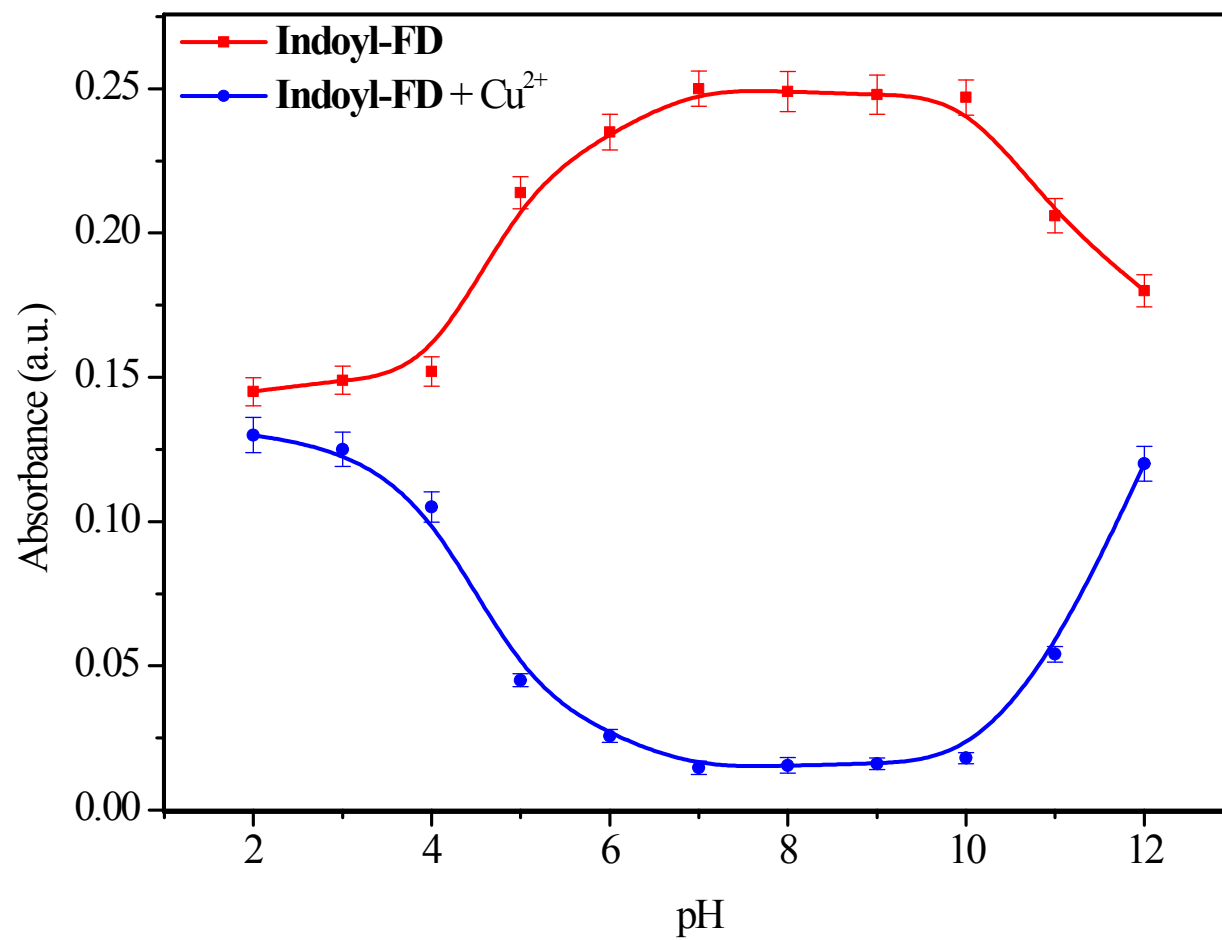

**Figure S56** Dependence of fluorescence response of furandioneD–Al<sup>3+</sup> over pH of the medium (MeOH/Water, 2/8, v/v) was used as a solvent.

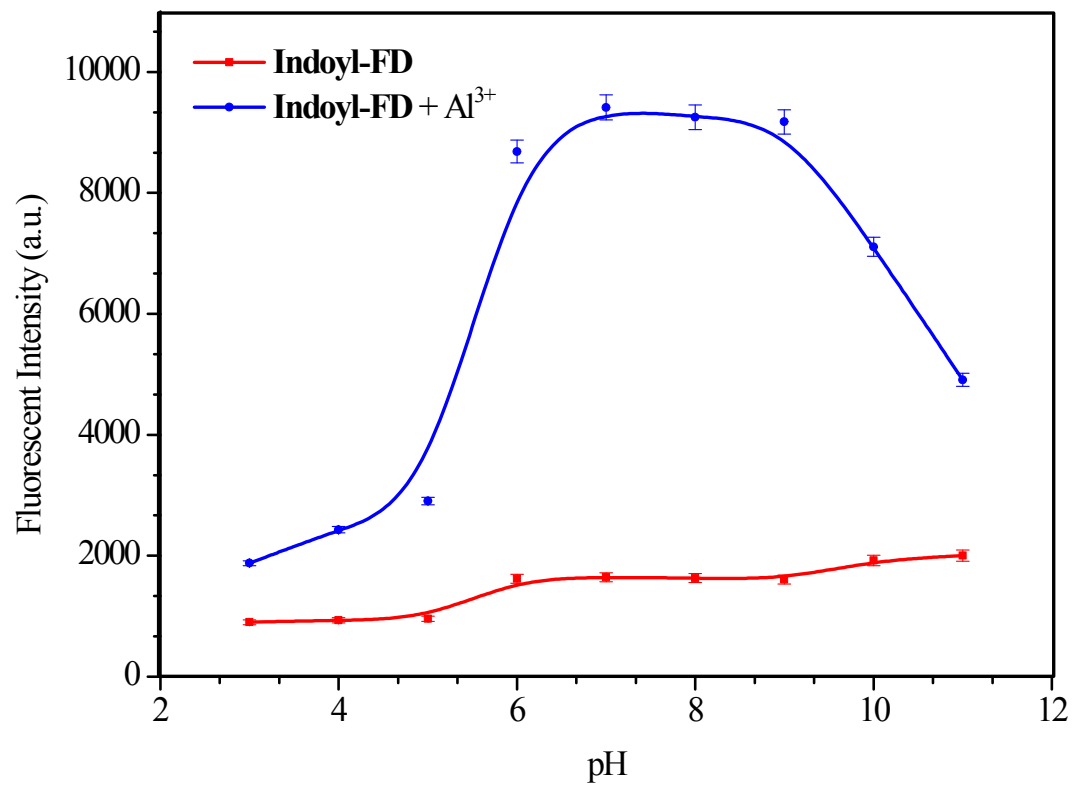



**Figure S57** Reversibility and reusability test of furandione **D**-Cu<sup>2+</sup> in the presence of EDTA.

Compound **D** (20  $\mu$ M in MeOH) with equimolar concentration of EDTA and Cu<sup>2+</sup>.

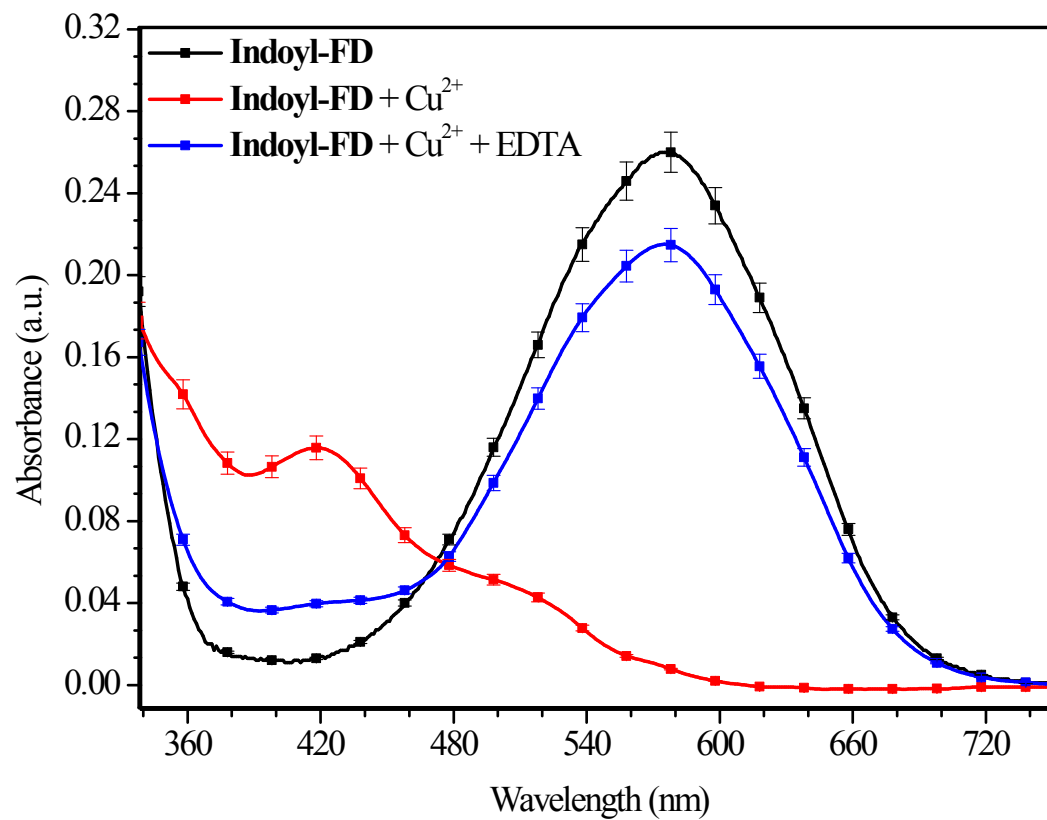

**Figure S8** Reversibility and reusability test of furandione**D**-Al<sup>3+</sup> in the presence of EDTA. Compound **D** (20  $\mu$ M in MeOH) with equimolar concentration of EDTA and Al<sup>3+</sup>.

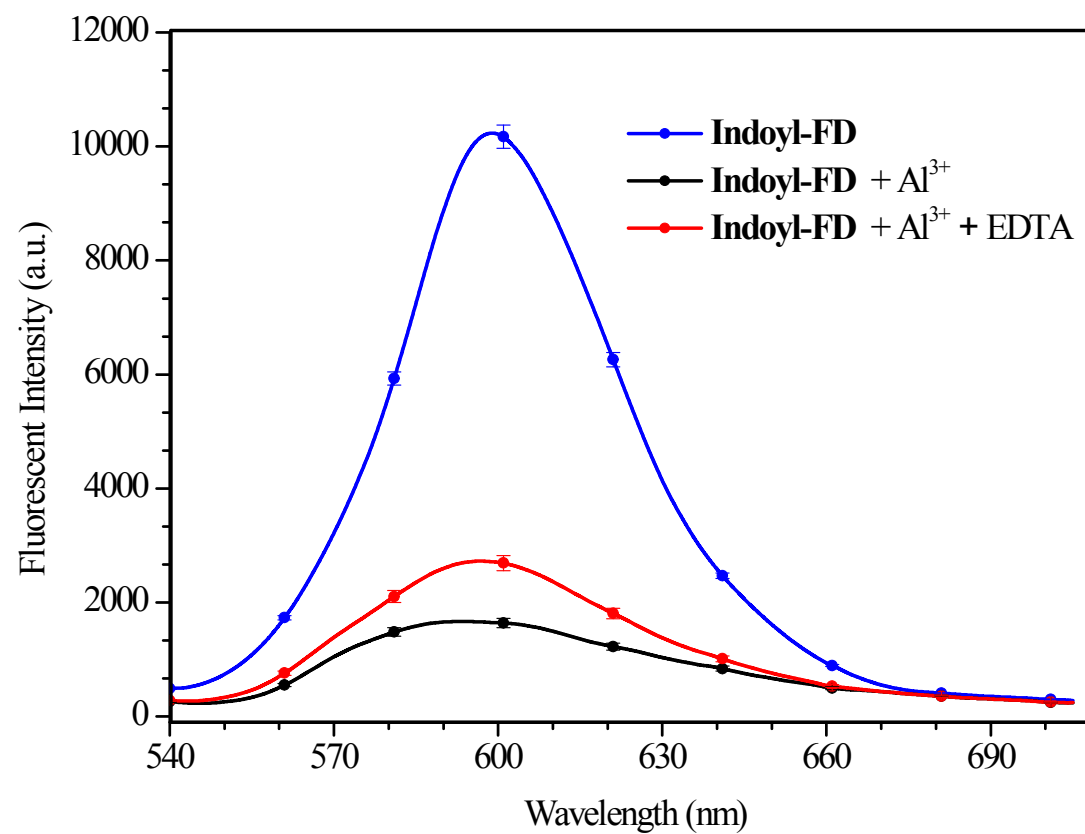

Supplement: c6ay01786j1.pdf [file c6ay01786j1.pdf]
